# Supplementary material for: Technology Informatics Guiding Education Reform – TIGER : An International Recommendation Framework of Core Competencies in Health Informatics for Nurses
Source: PubMed Central journal article supplement — Methods Inf Med. 2018 Jun 20;57(Suppl 1):e30–42. doi: 10.3414/ME17-01-0155 (PMC6193400; doi:10.3414/me17-01-0155), 2018-06-20

DOI: <https://doi.org/10.3414/ME17-01-0155>

**APPENDIX B Relevance ratings (REL) for all 24 core competencies**

## Clinical Nursing (n = 41)

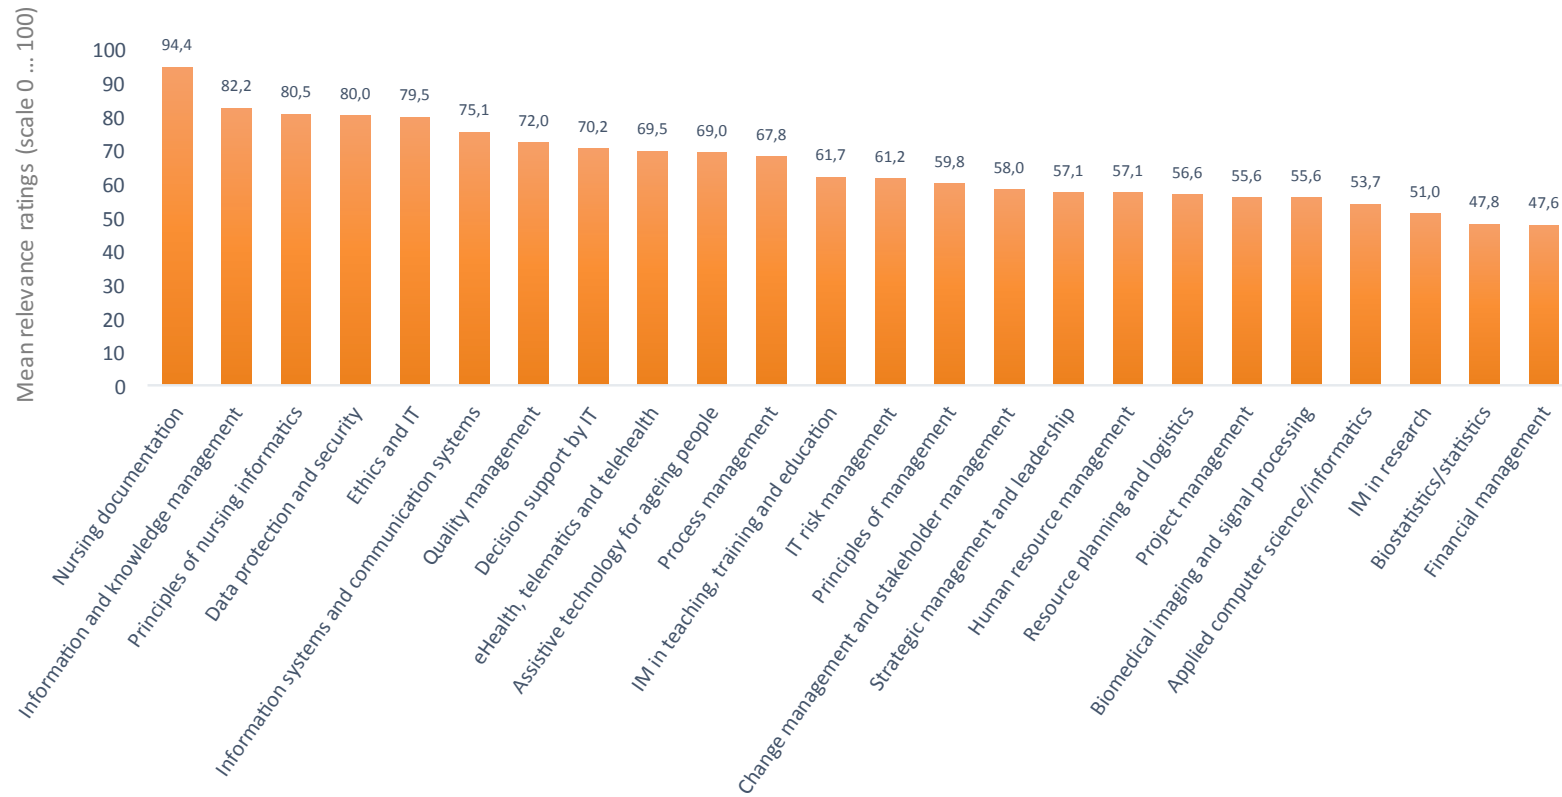

# Quality Management (n = 41)

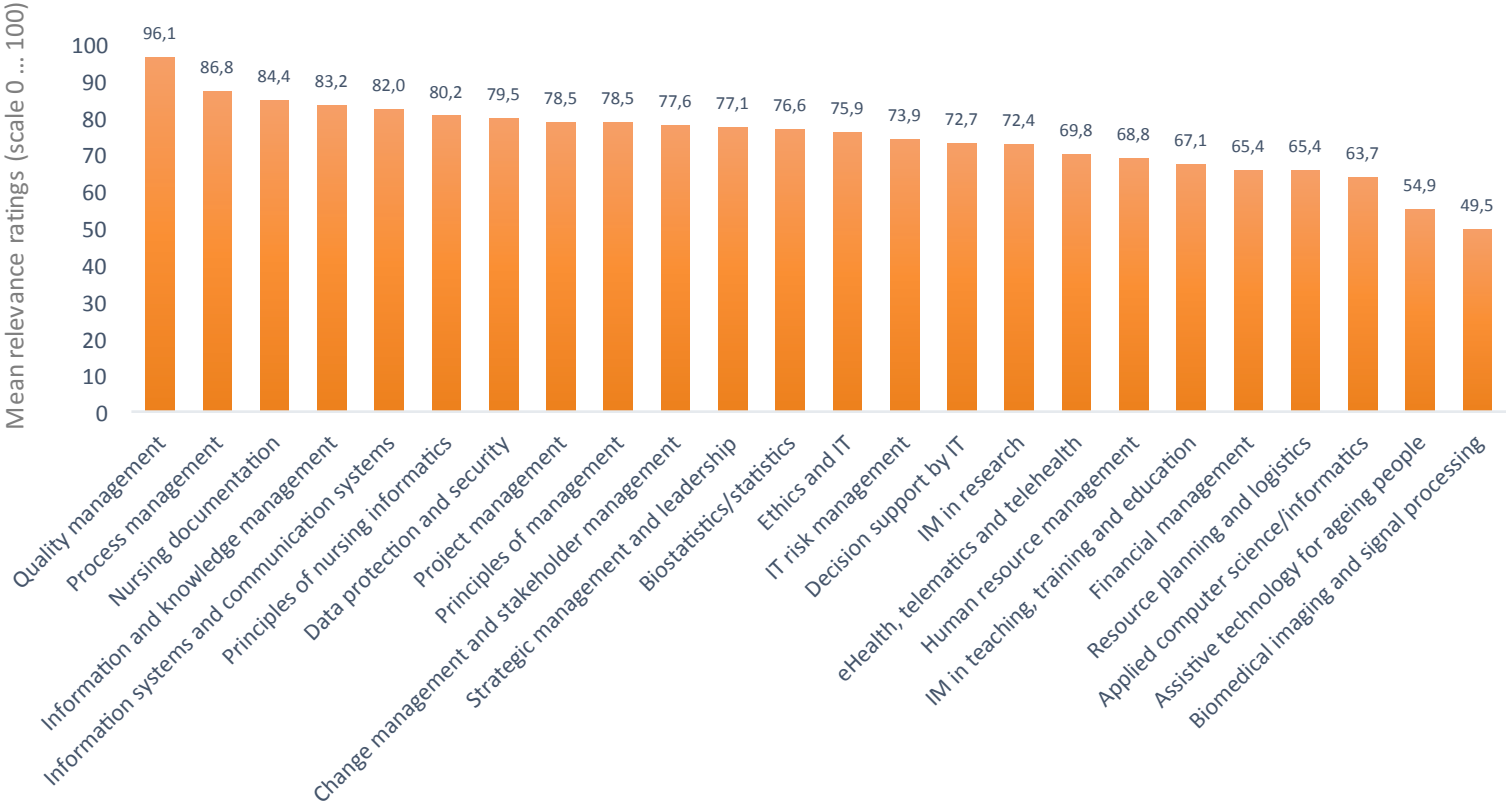

## Coordination of Inter-professional Care (n =41)

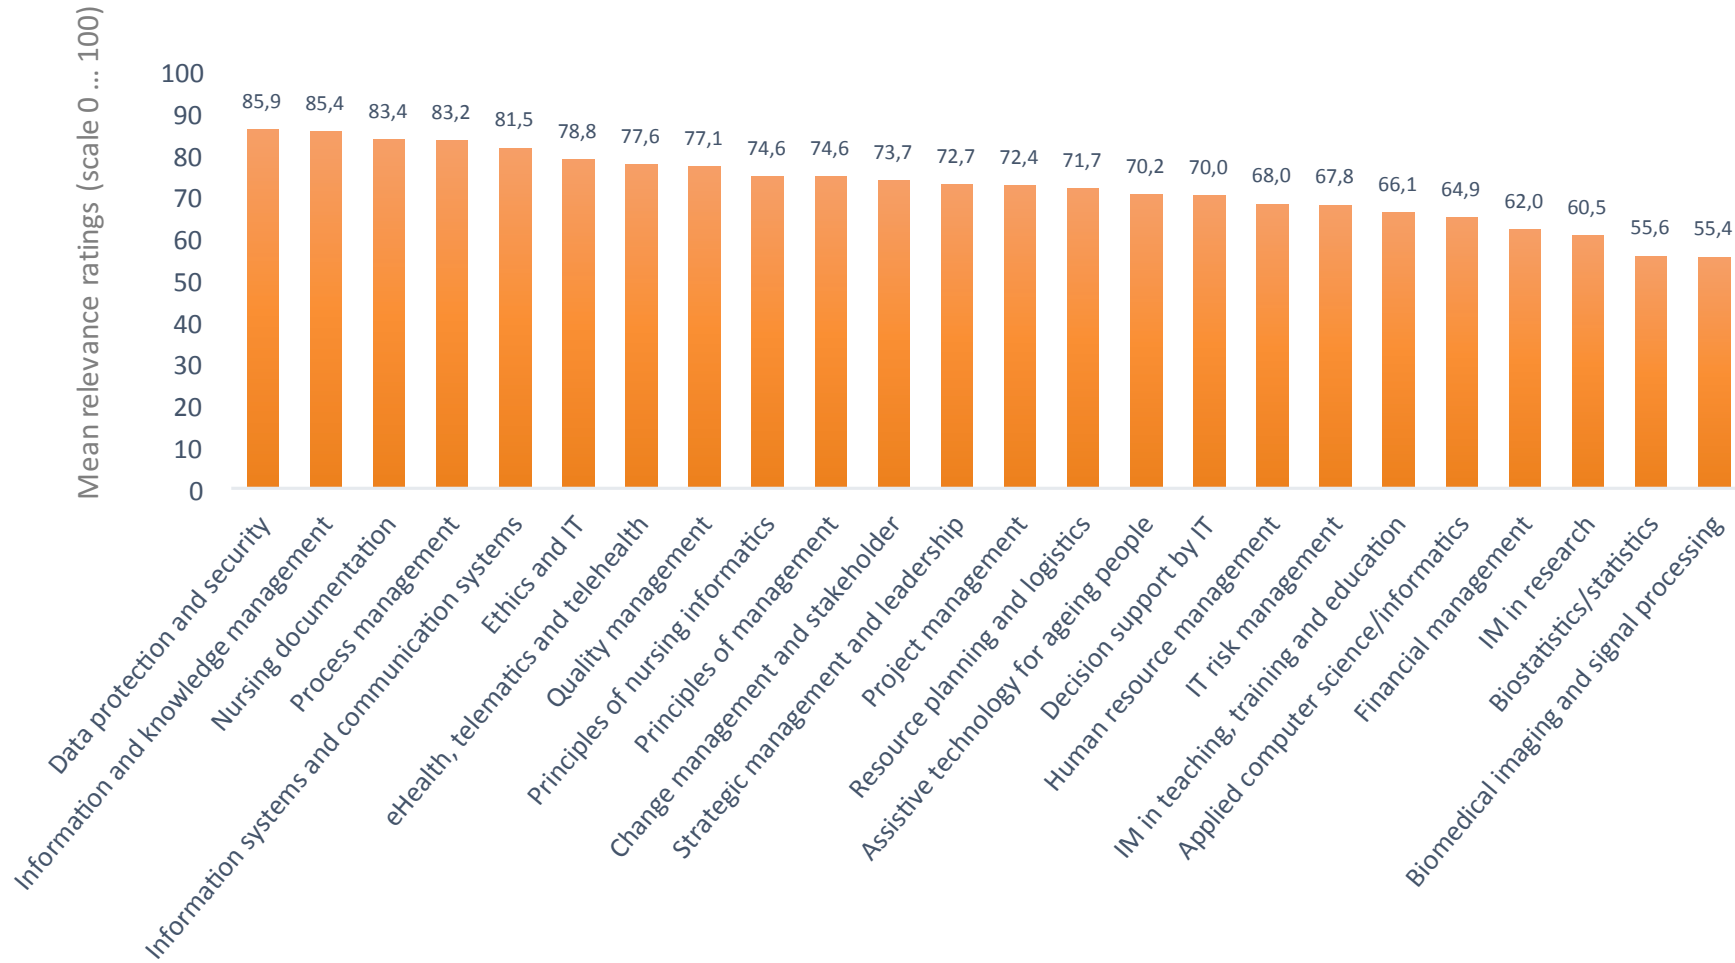

## Nursing Management (n = 43)

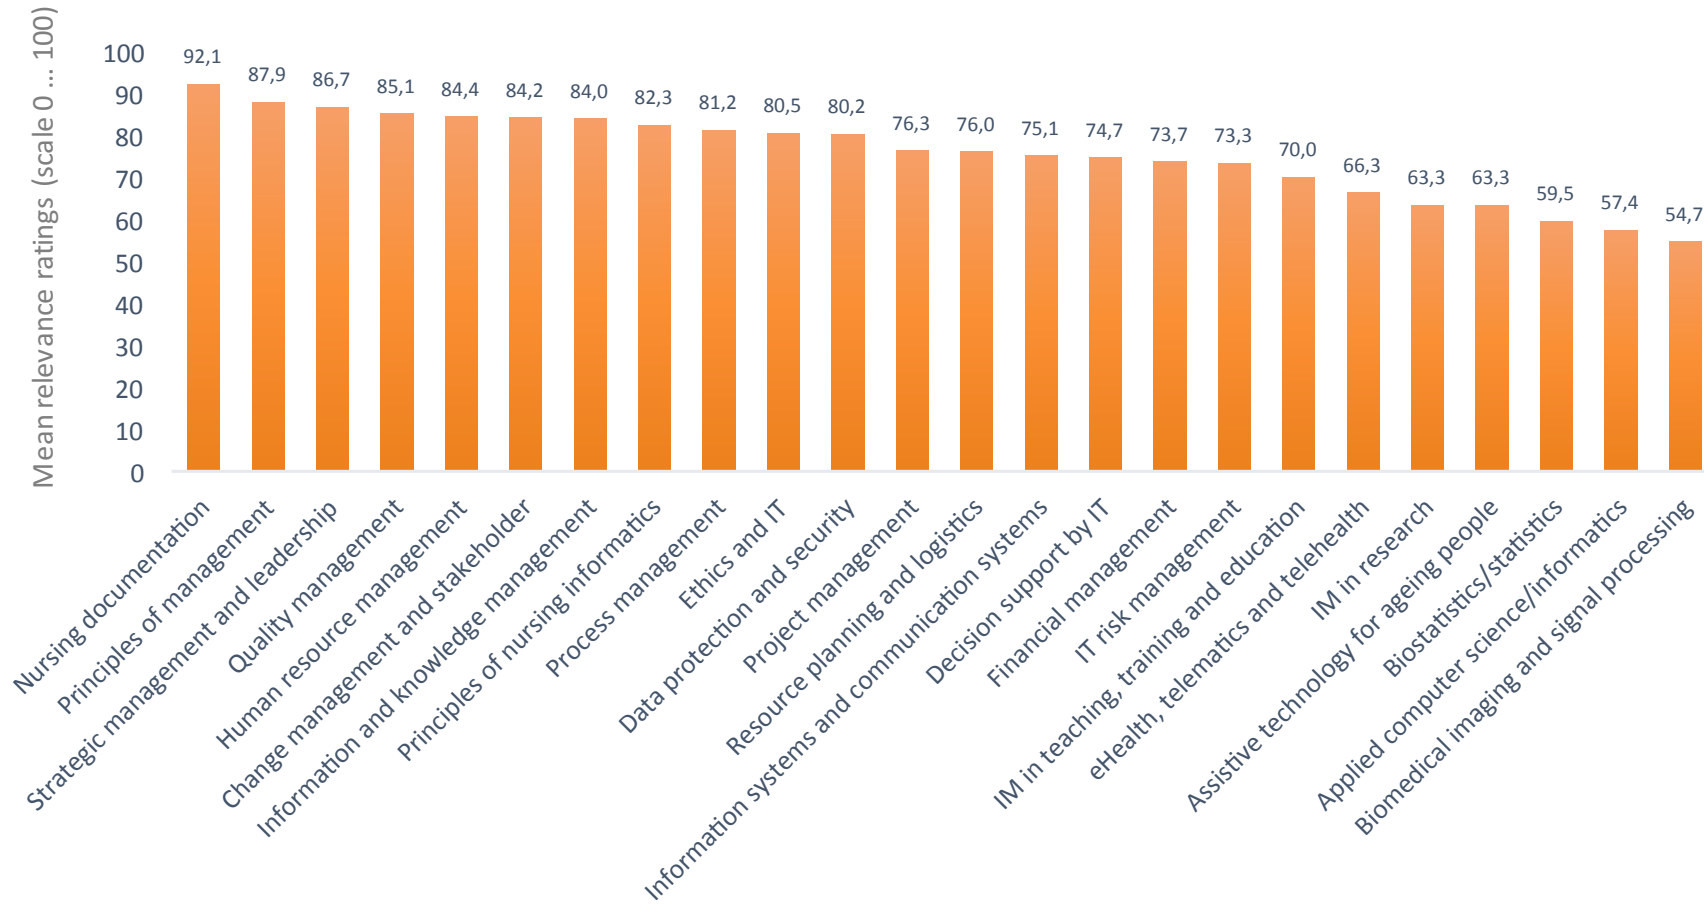

## IT Management (n = 41)

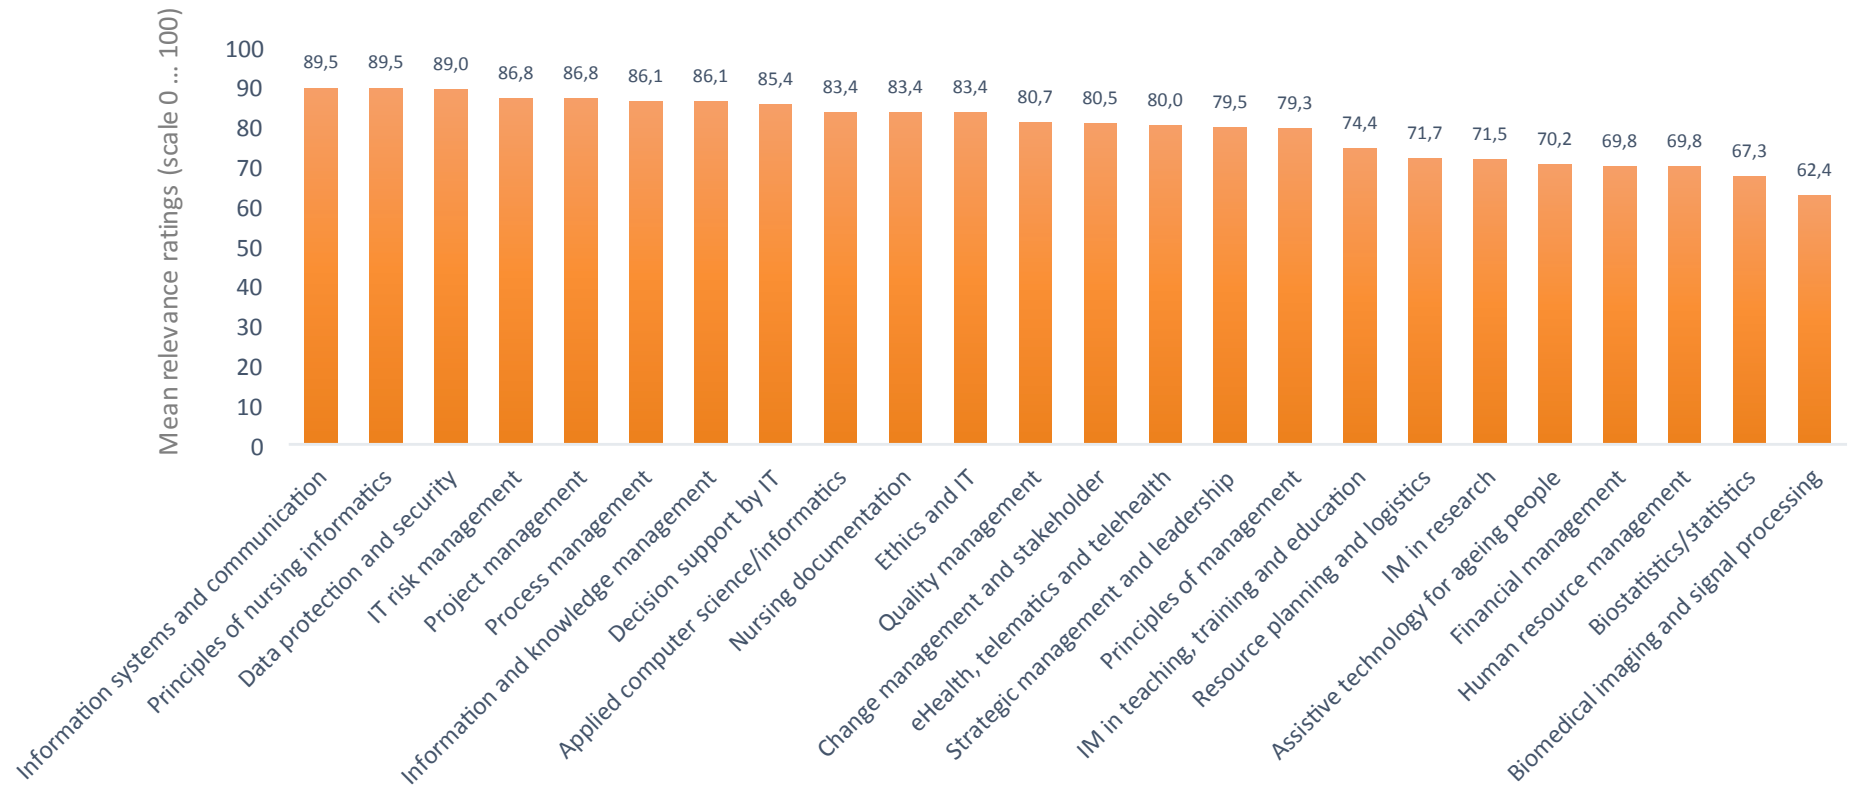

Supplement: 10-3414-me17-01-0155-supp2.pdf [file 10-3414-me17-01-0155-supp2.pdf]
